# Supplementary material for: Lactate Increases Renal Cell Carcinoma Aggressiveness through Sirtuin 1-Dependent Epithelial Mesenchymal Transition Axis Regulation
Source: Cells. 2020 Apr 23;9(4):1053. doi: 10.3390/cells9041053 (PMC7226526; doi:10.3390/cells9041053)
Supplement: Supplementary file 1 [file cells-09-01053-s001.pdf]

## Supplementary Tables

**Table S1.** Clinical pathologic characterization of epithelial human kidney cell lines

| Kidney cell lines |                                                                                  |
|-------------------|----------------------------------------------------------------------------------|
| <b>HKC-8</b>      | Human renal proximal tubule epithelial cells                                     |
| <b>786-O</b>      | Primary clear cell renal cell carcinoma                                          |
| <b>Caki-1</b>     | Metastatic clear cell renal cell carcinoma<br>(metastatic site: skin)            |
| <b>Caki-2</b>     | Primary papillary renal cell carcinoma                                           |
| <b>ACHN</b>       | Metastatic papillary renal cell carcinoma<br>(metastatic site: pleural effusion) |

**Table S2.** Primer used in RT-qPCR

| Gene                          | Forward sequence (5'-3') | Reverse sequence (5'-3') | T annealing |
|-------------------------------|--------------------------|--------------------------|-------------|
| <b>SIRT1</b>                  | GCGGGAATCCAAAGGATAAT     | GCACCTAGGACATCGAGGAA     | 60°C        |
| <b><math>\beta</math>-GUS</b> | CTCATTGGAATTTTGCCGATT    | CCGAGTGAAGATCCCCTTTTA    | 60°C        |

**Table S3.** Primary antibodies used in WB and IF

| Primary antibody                  | Company                             | Western-Blot dilution         | IF dilution | Second antibody specie |
|-----------------------------------|-------------------------------------|-------------------------------|-------------|------------------------|
| <b>H3</b>                         | Abcam, ab1791                       | 1:5000,<br>5% BSA in TBS/T    | n.a.        | Anti-rabbit            |
| <b>H3ac</b>                       | Millipore,<br>06-599                | 1:5000,<br>5% BSA in TBS/T    | 1:250       | Anti-rabbit            |
| <b>H3K9ac</b>                     | Millipore, SC20058                  | 1:500,<br>5% BSA in TBS/T     | 1:150       | Anti-rabbit            |
| <b>N-cadherin</b>                 | Cell Signaling<br>Technology, 1311  | 1:1000,<br>5% BSA in TBS/T    | 1:100       | Anti-rabbit            |
| <b>SIRT1</b>                      | Abcam, ab32441                      | 1:1000,<br>5% milk in TBS/T   | 1:250       | Anti-rabbit            |
| <b>SMAD4</b>                      | Cell Signaling<br>Technology, 38454 | 1:1000,<br>5% milk in TBS/T   | n.a.        | Anti-rabbit            |
| <b>SNAIL</b>                      | Cell Signaling<br>Technology, 3879  | 1:1000,<br>5% milk in TBS/T   | n.a.        | Anti-rabbit            |
| <b>Vimentin</b>                   | Leica, VIM-V9-LCE                   | 1:1000,<br>5% milk in TBS/T   | n.a.        | Anti-mouse             |
| <b><math>\beta</math>-Actin</b>   | Sigma-Aldrich,<br>A1978             | 1:10,000,<br>5% milk in TBS/T | n.a.        | Anti-mouse             |
| <b><math>\beta</math>-Catenin</b> | Cell Signaling<br>Technology, 8480  | 1:1000,<br>5% milk in TBS/T   | n.a.        | Anti-rabbit            |

IF – Immunofluorescence; n.a. – not applicable

**Table S4.** Primary antibodies used in IHC

| Primary antibody  | Company                         | Positive control | Antigen retrieval                       | Primary antibody dilution | Detection system                       |
|-------------------|---------------------------------|------------------|-----------------------------------------|---------------------------|----------------------------------------|
| <b>H3K9ac</b>     | Millipore, SC20058              | Colon            | Citrate buffer (10mM, pH=6), microwave  | 1:750 overnight RT        | Novolink™ Max Polymer Detection System |
| <b>Ki67</b>       | M7240, DAKO                     | Breast cancer    | Citrate buffer (10mM, pH=6), water bath | 1:200 1h RT               | UltraVision Detection System           |
| <b>N-cadherin</b> | Cell Signaling Technology, 1311 | Testis           | EDTA buffer (1mM, pH=8), microwave      | 1:500 overnight RT        | Novolink™ Max Polymer Detection System |
| <b>SIRT1</b>      | Abcam, ab32441                  | Colon            | EDTA buffer (1mM, pH=8), microwave      | 1:350 overnight RT        | Novolink™ Max Polymer Detection System |

RT – Room temperature

**Table S5.** Immunoexpression in CAM tissues

|               |              | CTR      | LAC      | NAM      | CHC      |
|---------------|--------------|----------|----------|----------|----------|
|               | n            | 7        | 7        | 8        | 5        |
| <b>SIRT1</b>  | Negative (%) | 0 (0)    | 1 (14.3) | 1 (12.5) | 2 (40.0) |
|               | Positive (%) | 7 (100)  | 6 (85.7) | 7 (87.5) | 3 (60.0) |
|               | n            | 6        | 8        | 9        | 5        |
| <b>NCAD</b>   | Negative (%) | 6 (100)  | 5 (57.1) | 3 (33.0) | 5 (100)  |
|               | Positive (%) | 0 (0)    | 3 (42.9) | 6 (67.0) | 0 (0)    |
|               | n            | 5        | 9        | 9        | 7        |
| <b>H3K9ac</b> | Negative (%) | 2 (40.0) | 1 (11.1) | 0 (0)    | 4 (57.1) |
|               | Positive (%) | 3 (60.0) | 8 (88.9) | 9 (100)  | 3 (42.9) |
|               | n            | 6        | 9        | 8        | 7        |
| <b>Ki67</b>   | Negative (%) | 2 (33.3) | 4 (44.4) | 3 (37.5) | 5 (71.4) |
|               | Positive (%) | 4 (66.7) | 5 (55.6) | 5 (62.5) | 2 (28.6) |

**Table S6.** SIRT1 and NCAD immunoexpression in normal kidney and RCC tissues

|              |                | Normal Kidney | ccRCC     | pRCC      |
|--------------|----------------|---------------|-----------|-----------|
|              | n              | 30            | 40        | 39        |
| <b>SIRT1</b> | Negative (%)   | 3 (10.0)      | 17 (42.5) | 11 (28.2) |
|              | Positive (%)   | 27 (90.0)     | 23 (57.5) | 28 (71.8) |
|              | <i>p value</i> | n.a.          | 0.0033    | 0.0764    |
|              | n              | 30            | 38        | 38        |
| <b>NCAD</b>  | Negative (%)   | 26 (86.7)     | 15 (39.5) | 17 (44.7) |
|              | Positive (%)   | 4 (13.3)      | 23 (60.5) | 21 (55.3) |
|              | <i>p value</i> | n.a.          | 0.0001    | 0.0004    |

ccRCC – Clear cell Renal Cell Carcinoma; pRCC – Papillary Renal Cell Carcinoma

**Table S7.** Associations between NCAD and SIRT1 in RCC tissues

|       |              | NCAD      |           | <i>p value</i> |
|-------|--------------|-----------|-----------|----------------|
|       |              | Negative  | Positive  |                |
| SIRT1 | n            | 75        |           |                |
|       | Negative (%) | 6 (8.0)   | 19 (25.3) | 0.0266         |
|       | Positive (%) | 26 (34.7) | 24 (32.0) |                |

## Supplementary figures

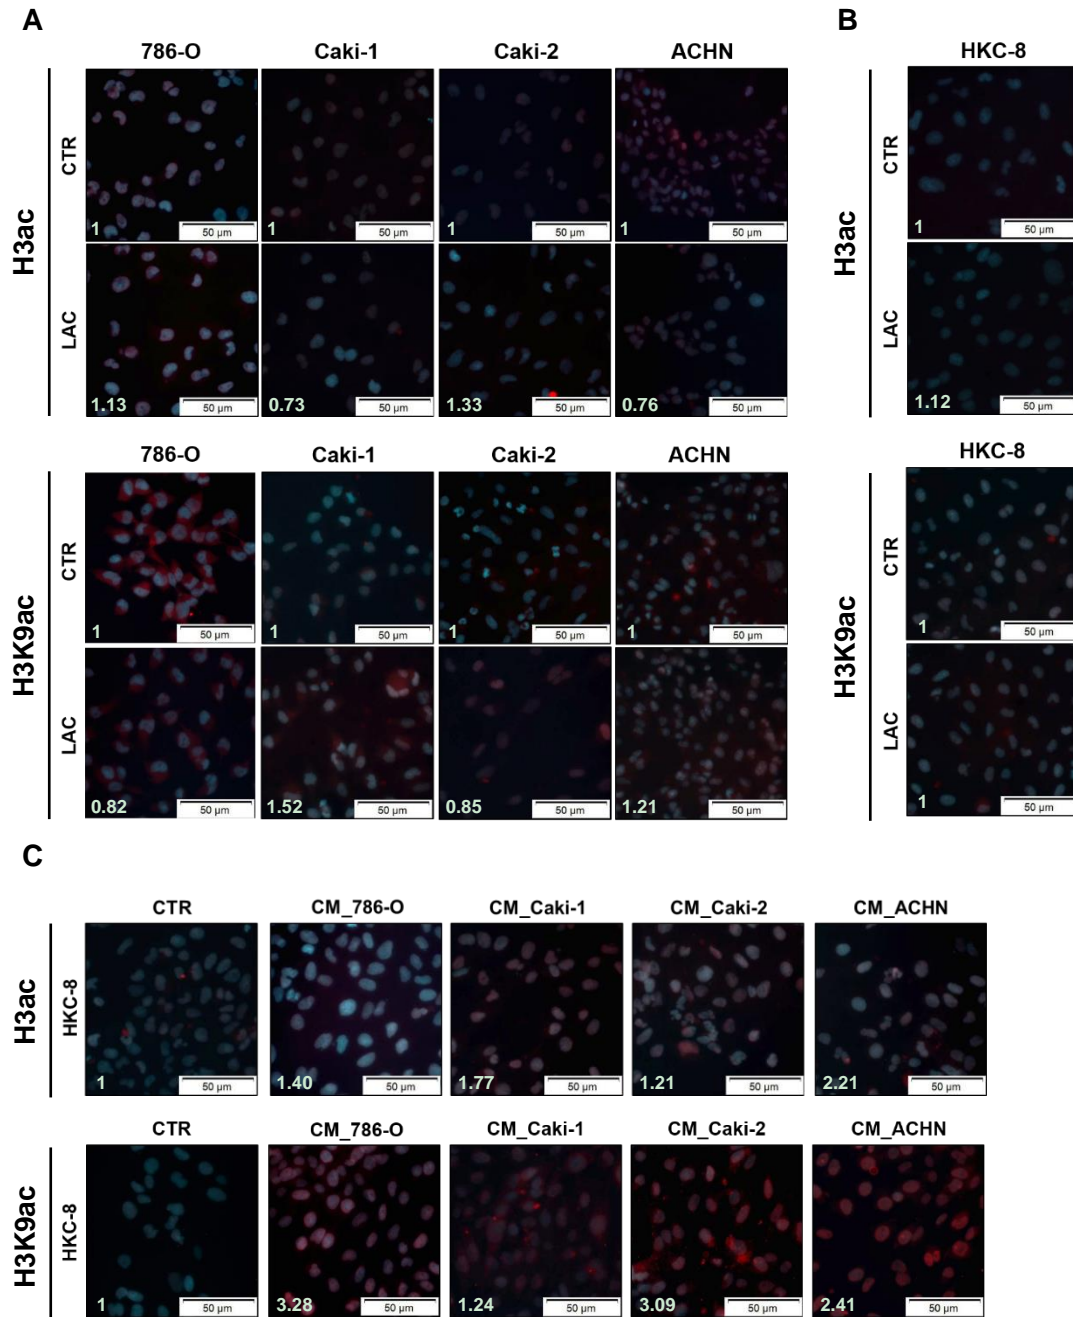

**Figure S1:** Characterization of total global H3 acetylation and specific histone markers H3K9 in RCC cell lines (A) and normal kidney cell lines (B) treated with 20mM lactate, and in normal kidney cell lines treated with conditioned medium from tumor cells (C). Fluorescence intensity ratio (white) for different studied conditions was normalized to control condition. Abbreviations: CTR – Control, Lac – 20mM lactate, CM – Conditioned medium.

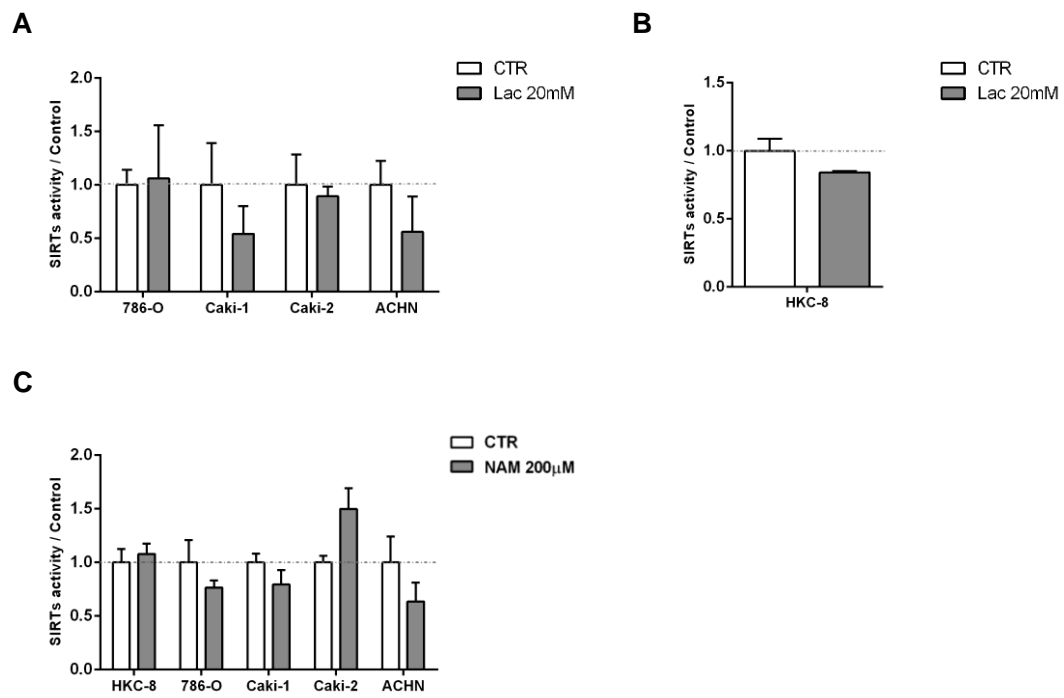

**Figure S2:** Characterization of sirtuin activity in RCC (A) and normal kidney cells (B) treated with 20mM lactate, as well as 200μM NAM (C). Abbreviations: CTR – Control, Lac – 20mM lactate, NAM – 200μM nicotinamide.

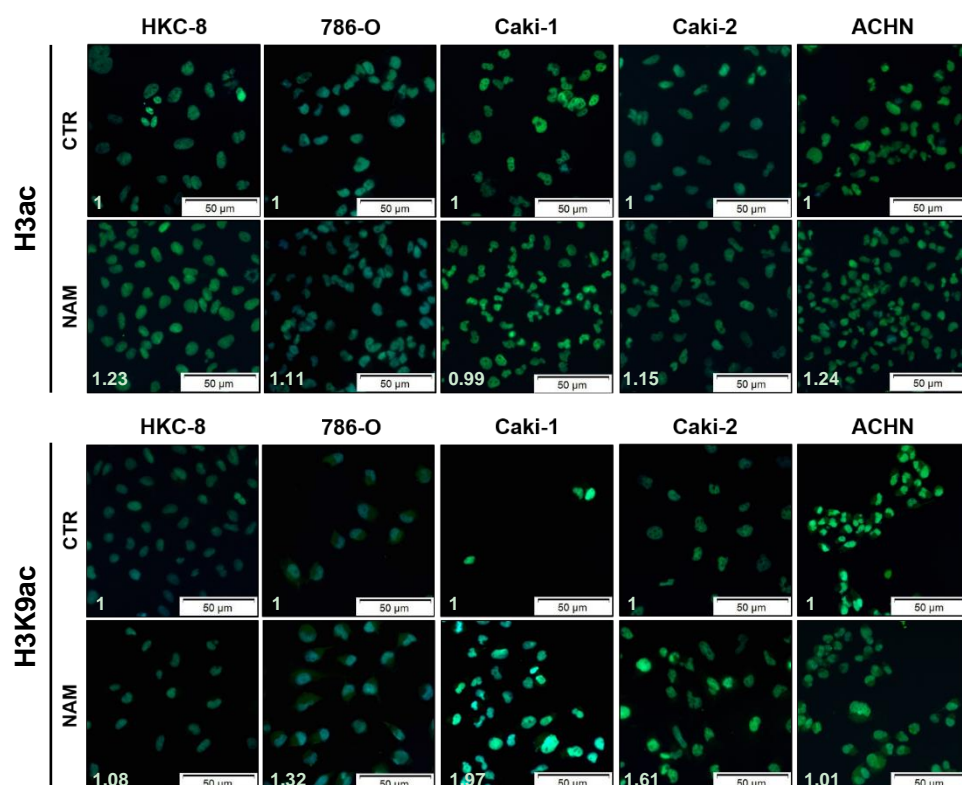

**Figure S3.** Characterization of global H3 acetylation and specific histone markers H3K9 protein expression in kidney cell lines treated with 200µM NAM. Fluorescence intensity ratio (white) for NAM condition was normalized to control condition. Abbreviations: CTR – Control, NAM – 200µM nicotinamide.

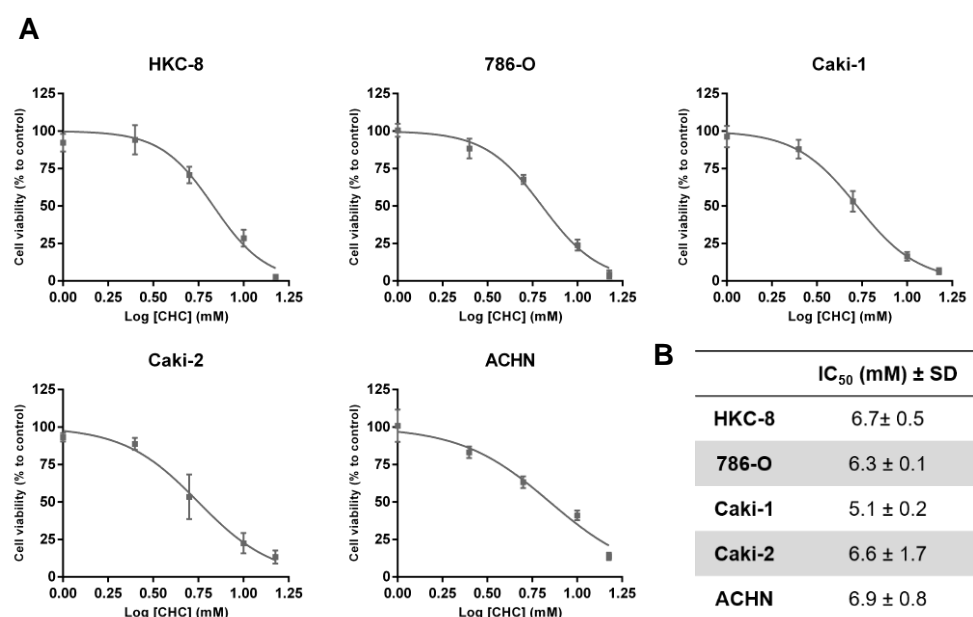

**Figure S4.** Growth inhibition by CHC. Cell viability curves after 48h of CHC treatment (1, 2.5, 5, 10 and 15mM) (A) and IC<sub>50</sub> values (mean±SD) (B) for kidney cell lines.

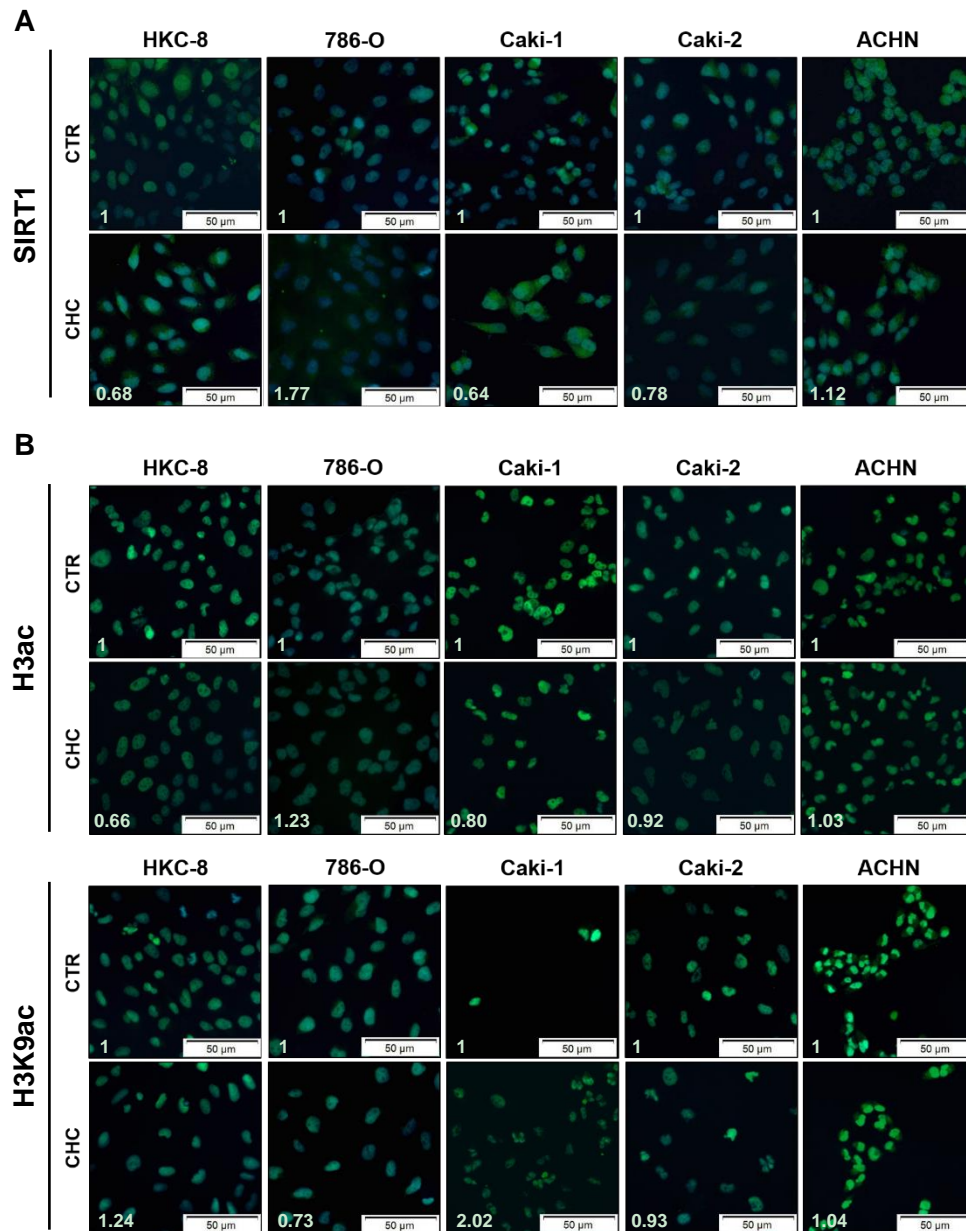

**Figure S5.** Characterization of SIRT1 (A), and global H3 acetylation and specific histone markers H3K9 (B) protein expression in kidney cell lines treated with CHC. Fluorescence intensity ratio (white) for CHC condition was normalized to control condition. Abbreviations: CTR – Control, CHC – Alpha-cyano-4-hydroxycinnamate.

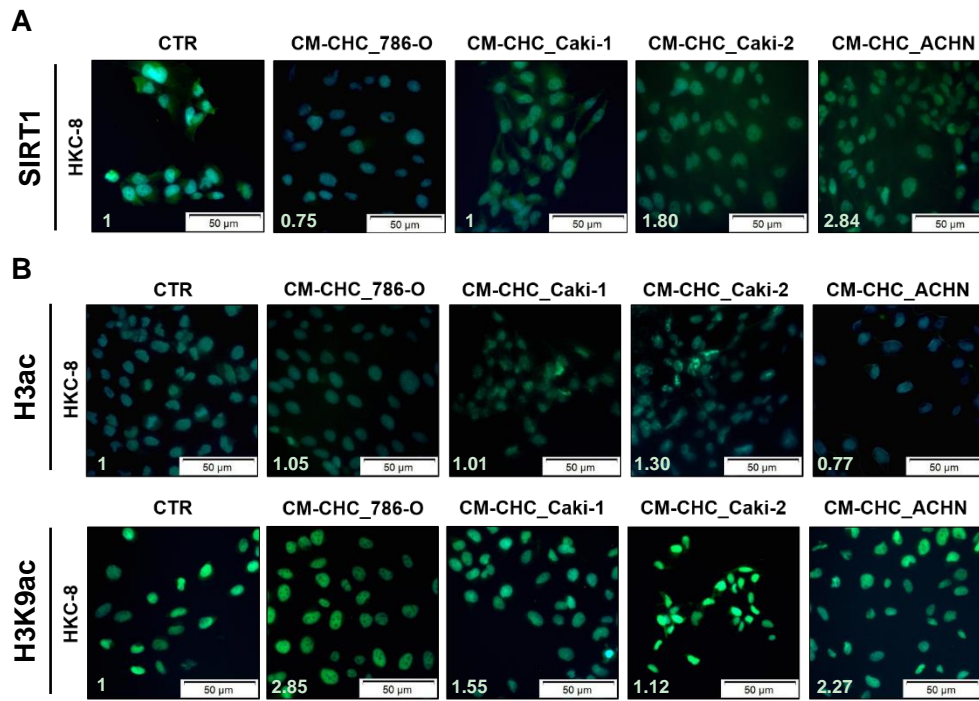

**Figure S6.** Characterization of SIRT1 (A), and global H3 acetylation and specific histone markers H3K9 (B) protein expression in kidney cell lines treated with CM-CHC. Fluorescence intensity ratio (white) for CM-CHC condition was normalized to control condition. Abbreviations: CTR – Control, CM-CHC – CM from tumor cells previously treated with alpha-cyano-4-hydroxycinnamate (CHC).
